# Supplementary material for: Focal accumulation of aromaticity at the CDRH3 loop mitigates 4E10 polyreactivity without altering its HIV neutralization profile
Source: PubMed Central journal article supplement — iScience. 2021 Aug 17;24(9):102987. doi: 10.1016/j.isci.2021.102987 (PMC8413895; doi:10.1016/j.isci.2021.102987), 2021-08-17
Supplement: mmc1.pdf [file mmc1.pdf]

**Supplemental information**

**Focal accumulation of aromaticity at the CDRH3  
loop mitigates 4E10 polyreactivity without  
altering its HIV neutralization profile**

**Edurne Rujas, Daniel P. Leaman, Sara Insausti, Pablo Carravilla, Miguel García-Porras, Eneko Largo, Izaskun Morillo, Rubén Sánchez-Eugenia, Lei Zhang, Hong Cui, Ibon Iloro, Félix Elortza, Jean-Philippe Julien, Christian Eggeling, Michael B. Zwick, Jose M.M. Caaveiro, and José L. Nieva**

# Supplemental Information

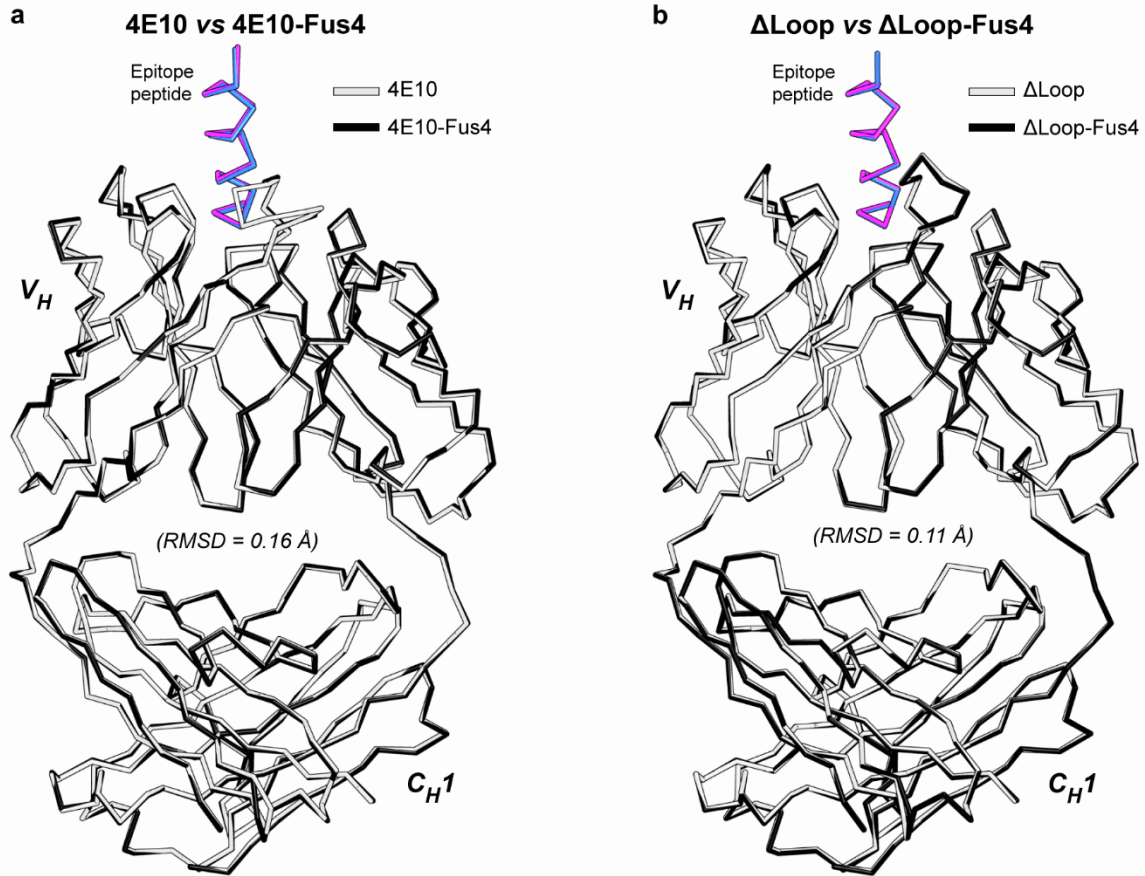

**Figure S1: Crystal structures of complexes of variants modified with Fus4.** (a) Superposition of the coordinates of the crystal structure of 4E10 (light gray) and 4E10 modified with Fus4 (black). The epitope peptide bound to the unmodified (blue) and to the modified antibody (magenta) is also shown. A root-mean-square-deviation (RMSD) value of 0.16 Å was achieved using the entire structure. (b) Superposition of the coordinates of the crystal structure of ΔLoop (light gray) and ΔLoop modified with Fus4 (black). The epitope peptide bound to the unmodified (blue) and modified (magenta) antibody is also depicted. A RMSD value of 0.11 Å was achieved.

13

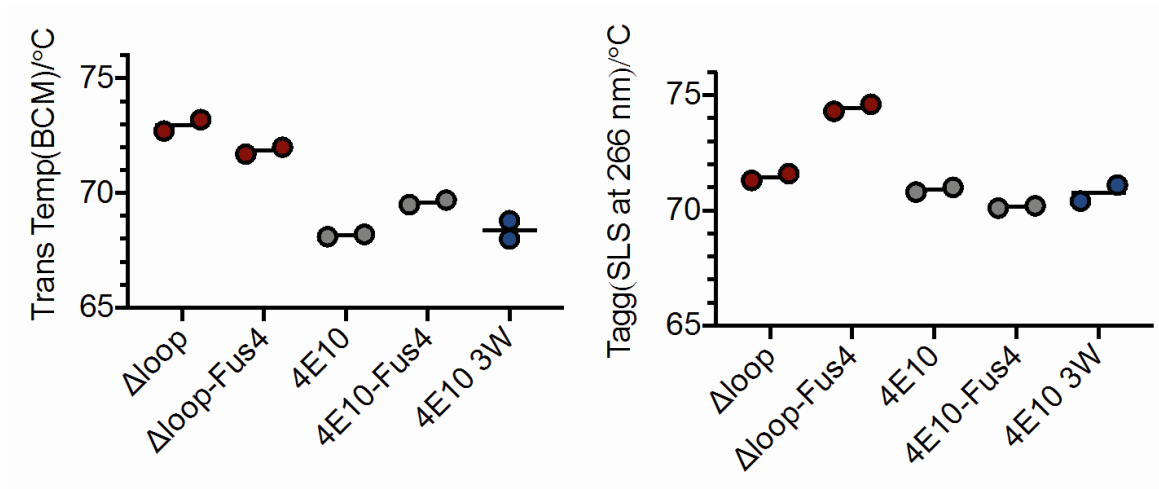

14

15 **Figure S2: Thermal stability comparison of the modified Fabs.** Melting ( $T_m$ , left panel)  
16 and aggregation temperature ( $T_{agg}$ , right panel) of 4E10 3W Fab (blue), the modified and  
17 unmodified  $\Delta$ Loop Fabs (dark red) and the modified and unmodified 4E10 Fabs (grey).

18

19

20 **Table S1: Data collection and refinement statistics.**

21 Statistical values given in parenthesis refer to the highest resolution bin.

| <b>Data Collection</b>                                  | <b>4E10-Fus4</b>          | <b><math>\Delta</math>Loop-Fus4</b> |
|---------------------------------------------------------|---------------------------|-------------------------------------|
| Beamline                                                | XALOC (ALMA)              | XALOC (ALMA)                        |
| Space Group                                             | C 2                       | C 2                                 |
| Unit cell                                               |                           |                                     |
| a, b, c (Å)                                             | 158.11, 44.89, 86.04      | 157.98, 44.80, 85.95                |
| $\alpha$ , $\beta$ , $\gamma$ (°)                       | 90, 113.7, 90.0           | 90, 113.6, 90.0                     |
| Resolution (Å)                                          | 34.4 – 1.45 (1.53 – 1.45) | 34.4 – 1.70 (1.79 – 1.70)           |
| Wavelength                                              | 0.97953                   | 0.97953                             |
| Observations                                            | 537,252 (48,151)          | 140,231 (12,250)                    |
| Unique reflections                                      | 96,390 (12,753)           | 57,219 (6,629)                      |
| <i>R</i> <sub>merge</sub>                               | 0.089 (0.775)             | 0.095 (0.345)                       |
| CC <sub>1/2</sub>                                       | 0.996 (0.454)             | 0.988 (0.770)                       |
| <i>I</i> / $\sigma$ ( <i>I</i> )                        | 11.2 (3.0)                | 6.8 (2.3)                           |
| Multiplicity                                            | 5.6 (3.8)                 | 2.5 (1.8)                           |
| Completeness (%)                                        | 98.1 (89.9)               | 94.2 (75.1)                         |
| <b>Refinement Statistics</b>                            |                           |                                     |
| Resolution (Å)                                          | 34.4 - 1.45               | 34.4 - 1.70                         |
| <i>R</i> <sub>work</sub> / <i>R</i> <sub>free</sub> (%) | 12.0 / 15.1               | 15.8 / 19.1                         |
| No. complexes                                           | 1                         | 1                                   |
| No. atoms                                               |                           |                                     |
| Protein                                                 | 3,301                     | 3,320                               |
| Peptide                                                 | 147                       | 143                                 |
| Other                                                   | 40                        | 31                                  |
| Water                                                   | 480                       | 504                                 |
| B-factor (Å <sup>2</sup> )                              |                           |                                     |
| Protein                                                 | 20.3                      | 17.2                                |
| Peptide                                                 | 42.3                      | 23.1                                |
| Others                                                  | 26.0                      | 26.8                                |
| Water                                                   | 32.1                      | 28.4                                |
| Ramachandran Plot                                       |                           |                                     |
| Preferred (%)                                           | 92.5                      | 90.9                                |
| Allowed (%)                                             | 7.3                       | 8.9                                 |
| Outliers (%)                                            | 0.3                       | 0.3                                 |
| RMSD Bond (Å)                                           | 0.013                     | 0.012                               |
| RMSD Angle (°)                                          | 1.64                      | 1.62                                |
| PDB entry code                                          | 7EKB                      | 7EKK                                |

22

23

24
